# Supplementary material for: The Impact of Visitors on Non-Primate Species in Zoos: A Quantitative Review
Source: MDPI journal article supplement (doi:10.3390/ani13071178), 2023-03-28
Supplement: s1 [file s1]

Supplementary material

**File 2: Details on the way in which each animal-based measure changed in the different taxa or animal categories.**

Table S1. Details on the way in which each animal-based measures changed in amphibians

| Behaviour                    | Amphibians |        |         |           |           |      |                    |
|------------------------------|------------|--------|---------|-----------|-----------|------|--------------------|
|                              | Changed    | Closer | Further | Decreased | Increased | None | Percentage changed |
| Abrupt behaviour             | 0          | 0      | 0       | 0         | 0         | 0    | 0.0                |
| Activity/ inactivity         | 0          | 0      | 0       | 0         | 0         | 0    | 0.0                |
| Behavioural diversity        | 0          | 0      | 0       | 0         | 0         | 0    | 0.0                |
| Breathing rate               | 0          | 0      | 0       | 0         | 0         | 0    | 0.0                |
| Bodyweight                   | 0          | 0      | 0       | 0         | 0         | 0    | 0.0                |
| Cortisol/ corticosteroids    | 0          | 0      | 0       | 0         | 0         | 0    | 0.0                |
| Enclosure use                | 0          | 0      | 0       | 0         | 0         | 0    | 0.0                |
| Feeding                      | 0          | 0      | 0       | 0         | 0         | 0    | 0.0                |
| Grooming                     | 0          | 0      | 0       | 0         | 0         | 0    | 0.0                |
| HAI                          | 0          | 0      | 0       | 0         | 0         | 0    | 0.0                |
| HAI negative                 | 0          | 0      | 0       | 0         | 0         | 0    | 0.0                |
| HAI positive                 | 0          | 0      | 0       | 0         | 0         | 0    | 0.0                |
| Heart rate                   | 0          | 0      | 0       | 0         | 0         | 0    | 0.0                |
| Interaction with environment | 0          | 0      | 0       | 0         | 0         | 0    | 0.0                |
| Locomotion                   | 0          | 0      | 0       | 0         | 0         | 0    | 0.0                |
| Maintenance                  | 0          | 0      | 0       | 0         | 0         | 0    | 0.0                |
| Negative social              | 0          | 0      | 0       | 0         | 0         | 0    | 0.0                |
| Nervous                      | 0          | 0      | 0       | 0         | 0         | 0    | 0.0                |
| Olfactory                    | 0          | 0      | 0       | 0         | 0         | 0    | 0.0                |
| OOS                          | 0          | 0      | 0       | 0         | 0         | 0    | 0.0                |
| Other                        | 0          | 0      | 0       | 0         | 0         | 0    | 0.0                |
| Positive social              | 0          | 0      | 0       | 0         | 0         | 0    | 0.0                |
| Proximity to conspecifics    | 0          | 0      | 0       | 0         | 0         | 0    | 0.0                |
| Proximity to visitors        | 0          | 0      | 0       | 0         | 0         | 0    | 0.0                |
| Reactivity to people         | 0          | 0      | 0       | 0         | 0         | 0    | 0.0                |
| Reproduction/ maternal       | 0          | 0      | 0       | 0         | 0         | 0    | 0.0                |

|                         |   |   |   |   |   |   |       |
|-------------------------|---|---|---|---|---|---|-------|
| Resting                 | 0 | 0 | 0 | 0 | 0 | 0 | 0.0   |
| Solitary behaviour      | 0 | 0 | 0 | 0 | 0 | 0 | 0.0   |
| Species typical         | 0 | 0 | 0 | 0 | 0 | 0 | 0.0   |
| Stationary              | 0 | 0 | 0 | 0 | 0 | 0 | 0.0   |
| Stereotypical/ abnormal | 0 | 0 | 0 | 0 | 0 | 0 | 0.0   |
| Swimming                | 0 | 0 | 0 | 0 | 0 | 0 | 0.0   |
| Vigilance               | 0 | 0 | 0 | 0 | 0 | 0 | 0.0   |
| Visibility              | 0 | 0 | 0 | 5 | 0 | 0 | 100.0 |
| Vocalisation            | 0 | 0 | 0 | 0 | 0 | 0 | 0.0   |

Table S2. Details on the way in which each animal-based measures changed in birds

| Behaviour                    | Birds   |        |         |           |           |      | Percentage changed |
|------------------------------|---------|--------|---------|-----------|-----------|------|--------------------|
|                              | Changed | Closer | Further | Decreased | Increased | None |                    |
| Abrupt behaviour             | 0       | 0      | 0       | 0         | 0         | 0    | 0.0                |
| Activity/ inactivity         | 0       | 0      | 0       | 1         | 5         | 27   | 18.2               |
| Behavioural diversity        | 0       | 0      | 0       | 0         | 1         | 0    | 100.0              |
| Breathing rate               | 0       | 0      | 0       | 0         | 0         | 0    | 0.0                |
| Bodyweight                   | 0       | 0      | 0       | 0         | 0         | 0    | 0.0                |
| Cortisol/ corticosteroids    | 0       | 0      | 0       | 0         | 2         | 4    | 33.3               |
| Enclosure use                | 8       | 3      | 7       | 3         | 2         | 60   | 27.7               |
| Feeding                      | 0       | 0      | 0       | 1         | 2         | 22   | 12.0               |
| Grooming                     | 0       | 0      | 0       | 3         | 2         | 30   | 14.3               |
| HAI                          | 0       | 0      | 0       | 0         | 0         | 3    | 0.0                |
| HAI negative                 | 0       | 0      | 0       | 0         | 1         | 2    | 33.3               |
| HAI positive                 | 0       | 0      | 0       | 1         | 1         | 4    | 33.3               |
| Heart rate                   | 0       | 0      | 0       | 0         | 0         | 0    | 0.0                |
| Interaction with environment | 0       | 0      | 0       | 1         | 0         | 17   | 5.6                |
| Locomotion                   | 0       | 0      | 0       | 1         | 2         | 20   | 13.0               |
| Maintenance                  | 0       | 0      | 0       | 1         | 0         | 0    | 100.0              |
| Negative social              | 0       | 0      | 0       | 0         | 2         | 18   | 10.0               |
| Nervous                      | 0       | 0      | 0       | 0         | 0         | 0    | 0.0                |
| Olfactory                    | 0       | 0      | 0       | 0         | 0         | 0    | 0.0                |
| OOS                          | 0       | 0      | 0       | 0         | 0         | 9    | 0.0                |
| Other                        | 0       | 0      | 0       | 1         | 1         | 55   | 3.5                |
| Positive social              | 0       | 0      | 0       | 0         | 5         | 16   | 23.8               |

|                           |   |   |   |   |   |    |       |
|---------------------------|---|---|---|---|---|----|-------|
| Proximity to conspecifics | 0 | 0 | 0 | 2 | 1 | 1  | 75.0  |
| Proximity to visitors     | 0 | 0 | 0 | 0 | 2 | 0  | 100.0 |
| Reactivity to people      | 0 | 0 | 0 | 0 | 0 | 0  | 0.0   |
| Reproduction/maternal     | 0 | 0 | 0 | 0 | 0 | 10 | 0.0   |
| Resting                   | 0 | 0 | 0 | 8 | 3 | 16 | 40.7  |
| Solitary behaviour        | 0 | 0 | 0 | 0 | 0 | 0  | 0.0   |
| Species typical           | 0 | 0 | 0 | 0 | 0 | 2  | 0.0   |
| Stationary                | 0 | 0 | 0 | 0 | 0 | 2  | 0.0   |
| Stereotypical/abnormal    | 0 | 0 | 0 | 1 | 2 | 61 | 4.7   |
| Swimming                  | 0 | 0 | 0 | 2 | 3 | 8  | 38.5  |
| Vigilance                 | 0 | 0 | 0 | 0 | 7 | 8  | 46.7  |
| Visibility                | 0 | 0 | 0 | 1 | 0 | 7  | 12.5  |
| Vocalisation              | 0 | 0 | 0 | 1 | 1 | 10 | 16.7  |

Table S3. Details on the way in which each animal-based measures changed in fish

| Behaviour                    | Fish    |        |         |           |           |      | Percentage changed |
|------------------------------|---------|--------|---------|-----------|-----------|------|--------------------|
|                              | Changed | Closer | Further | Decreased | Increased | None |                    |
| Abrupt behaviour             | 0       | 0      | 0       | 0         | 0         | 0    | 0.0                |
| Activity/inactivity          | 0       | 0      | 0       | 0         | 0         | 1    | 0.0                |
| Behavioural diversity        | 0       | 0      | 0       | 0         | 0         | 0    | 0.0                |
| Breathing rate               | 0       | 0      | 0       | 0         | 0         | 0    | 0.0                |
| Bodyweight                   | 0       | 0      | 0       | 0         | 0         | 0    | 0.0                |
| Cortisol/corticosteroids     | 0       | 0      | 0       | 0         | 0         | 0    | 0.0                |
| Enclosure use                | 1       | 0      | 3       | 0         | 2         | 8    | 42.9               |
| Feeding                      | 0       | 0      | 0       | 0         | 0         | 0    | 0.0                |
| Grooming                     | 0       | 0      | 0       | 0         | 0         | 0    | 0.0                |
| HAI                          | 0       | 0      | 0       | 0         | 0         | 0    | 0.0                |
| HAI negative                 | 0       | 0      | 0       | 0         | 0         | 0    | 0.0                |
| HAI positive                 | 0       | 0      | 0       | 0         | 0         | 0    | 0.0                |
| Heart rate                   | 0       | 0      | 0       | 0         | 0         | 0    | 0.0                |
| Interaction with environment | 0       | 0      | 0       | 0         | 0         | 6    | 0.0                |
| Locomotion                   | 0       | 0      | 0       | 0         | 0         | 0    | 0.0                |

|                           |   |   |   |   |   |   |      |
|---------------------------|---|---|---|---|---|---|------|
| Maintenance               | 0 | 0 | 0 | 0 | 0 | 0 | 0.0  |
| Negative social           | 0 | 0 | 0 | 0 | 0 | 0 | 0.0  |
| Nervous                   | 0 | 0 | 0 | 0 | 0 | 0 | 0.0  |
| Olfactory                 | 0 | 0 | 0 | 0 | 0 | 0 | 0.0  |
| OOS                       | 0 | 0 | 0 | 0 | 0 | 0 | 0.0  |
| Other                     | 0 | 0 | 0 | 0 | 0 | 0 | 0.0  |
| Positive social           | 0 | 0 | 0 | 0 | 0 | 2 | 0.0  |
| Proximity to conspecifics | 0 | 0 | 0 | 0 | 0 | 0 | 0.0  |
| Proximity to visitors     | 0 | 0 | 0 | 0 | 0 | 0 | 0.0  |
| Reactivity to people      | 0 | 0 | 0 | 0 | 0 | 0 | 0.0  |
| Reproduction/maternal     | 0 | 0 | 0 | 0 | 0 | 0 | 0.0  |
| Resting                   | 0 | 0 | 0 | 2 | 1 | 7 | 30.0 |
| Solitary behaviour        | 0 | 0 | 0 | 0 | 1 | 1 | 50.0 |
| Species typical           | 0 | 0 | 0 | 0 | 0 | 0 | 0.0  |
| Stationary                | 0 | 0 | 0 | 0 | 0 | 0 | 0.0  |
| Stereotypical/abnormal    | 0 | 0 | 0 | 0 | 0 | 4 | 0.0  |
| Swimming                  | 0 | 0 | 0 | 2 | 3 | 8 | 38.5 |
| Vigilance                 | 0 | 0 | 0 | 0 | 0 | 0 | 0.0  |
| Visibility                | 0 | 0 | 0 | 0 | 0 | 0 | 0.0  |
| Vocalisation              | 0 | 0 | 0 | 0 | 0 | 0 | 0.0  |

Table S4. Details on the way in which each animal-based measures changed in invertebrates

| Behaviour                | Invertebrates |        |         |           |           |      |                    |
|--------------------------|---------------|--------|---------|-----------|-----------|------|--------------------|
|                          | Changed       | Closer | Further | Decreased | Increased | None | Percentage changed |
| Abrupt behaviour         | 0             | 0      | 0       | 0         | 0         | 0    | 0.0                |
| Activity/inactivity      | 0             | 0      | 0       | 0         | 0         | 0    | 0.0                |
| Behavioural diversity    | 0             | 0      | 0       | 0         | 0         | 0    | 0.0                |
| Breathing rate           | 0             | 0      | 0       | 0         | 0         | 0    | 0.0                |
| Bodyweight               | 0             | 0      | 0       | 0         | 0         | 0    | 0.0                |
| Cortisol/corticosteroids | 0             | 0      | 0       | 0         | 0         | 0    | 0.0                |
| Enclosure use            | 1             | 0      | 0       | 0         | 0         | 0    | 100.0              |
| Feeding                  | 0             | 0      | 0       | 0         | 0         | 0    | 0.0                |
| Grooming                 | 0             | 0      | 0       | 0         | 1         | 0    | 100.0              |
| HAI                      | 0             | 0      | 0       | 0         | 0         | 0    | 0.0                |
| HAI negative             | 0             | 0      | 0       | 0         | 0         | 0    | 0.0                |

|                              |   |   |   |   |   |   |     |
|------------------------------|---|---|---|---|---|---|-----|
| HAI positive                 | 0 | 0 | 0 | 0 | 0 | 0 | 0.0 |
| Heart rate                   | 0 | 0 | 0 | 0 | 0 | 0 | 0.0 |
| Interaction with environment | 0 | 0 | 0 | 0 | 0 | 1 | 0.0 |
| Locomotion                   | 0 | 0 | 0 | 0 | 0 | 1 | 0.0 |
| Maintenance                  | 0 | 0 | 0 | 0 | 0 | 0 | 0.0 |
| Negative social              | 0 | 0 | 0 | 0 | 0 | 0 | 0.0 |
| Nervous                      | 0 | 0 | 0 | 0 | 0 | 0 | 0.0 |
| Olfactory                    | 0 | 0 | 0 | 0 | 0 | 0 | 0.0 |
| OOS                          | 0 | 0 | 0 | 0 | 0 | 0 | 0.0 |
| Other                        | 0 | 0 | 0 | 0 | 0 | 0 | 0.0 |
| Positive social              | 0 | 0 | 0 | 0 | 0 | 0 | 0.0 |
| Proximity to conspecifics    | 0 | 0 | 0 | 0 | 0 | 0 | 0.0 |
| Proximity to visitors        | 0 | 0 | 0 | 0 | 0 | 0 | 0.0 |
| Reactivity to people         | 0 | 0 | 0 | 0 | 0 | 0 | 0.0 |
| Reproduction/maternal        | 0 | 0 | 0 | 0 | 0 | 0 | 0.0 |
| Resting                      | 0 | 0 | 0 | 0 | 0 | 0 | 0.0 |
| Solitary behaviour           | 0 | 0 | 0 | 0 | 0 | 0 | 0.0 |
| Species typical              | 0 | 0 | 0 | 0 | 0 | 0 | 0.0 |
| Stationary                   | 0 | 0 | 0 | 0 | 0 | 0 | 0.0 |
| Stereotypical/abnormal       | 0 | 0 | 0 | 0 | 0 | 0 | 0.0 |
| Swimming                     | 0 | 0 | 0 | 0 | 0 | 0 | 0.0 |
| Vigilance                    | 0 | 0 | 0 | 0 | 0 | 0 | 0.0 |
| Visibility                   | 0 | 0 | 0 | 0 | 0 | 2 | 0.0 |
| Vocalisation                 | 0 | 0 | 0 | 0 | 0 | 0 | 0.0 |

Table S5. Details on the way in which each animal-based measures changed in mammals

| Behaviour             | Mammals |        |         |           |           |      | Percentage changed |
|-----------------------|---------|--------|---------|-----------|-----------|------|--------------------|
|                       | Changed | Closer | Further | Decreased | Increased | None |                    |
| Abrupt behaviour      | 0       | 0      | 0       | 1         | 15        | 0    | 100.0              |
| Activity/inactivity   | 0       | 0      | 0       | 22        | 0         | 42   | 34.4               |
| Behavioural diversity | 0       | 0      | 0       | 1         | 0         | 0    | 100.0              |
| Breathing rate        | 0       | 0      | 0       | 0         | 1         | 1    | 50.0               |
| Bodyweight            | 0       | 0      | 0       | 1         | 0         | 0    | 100.0              |

|                                 |   |   |   |    |    |     |       |
|---------------------------------|---|---|---|----|----|-----|-------|
| Cortisol/<br>corticosteroids    | 0 | 0 | 0 | 1  | 14 | 12  | 55.6  |
| Enclosure use                   | 2 | 7 | 7 | 2  | 2  | 37  | 35.1  |
| Feeding                         | 0 | 0 | 0 | 9  | 9  | 61  | 22.8  |
| Grooming                        | 0 | 0 | 0 | 2  | 4  | 46  | 11.5  |
| HAI                             | 0 | 0 | 0 | 1  | 2  | 5   | 37.5  |
| HAI negative                    | 0 | 0 | 0 | 0  | 5  | 31  | 13.9  |
| HAI positive                    | 0 | 0 | 0 | 2  | 5  | 23  | 23.3  |
| Heart rate                      | 0 | 0 | 0 | 1  | 0  | 1   | 50.0  |
| Interaction with<br>environment | 0 | 0 | 0 | 6  | 4  | 33  | 23.3  |
| Locomotion                      | 0 | 0 | 0 | 6  | 9  | 61  | 19.7  |
| Maintenance                     | 0 | 0 | 0 | 0  | 0  | 2   | 0.0   |
| Negative social                 | 0 | 0 | 0 | 3  | 4  | 52  | 11.9  |
| Nervous                         | 0 | 0 | 0 | 0  | 0  | 2   | 0.0   |
| Olfactory                       | 0 | 0 | 0 | 0  | 1  | 15  | 6.3   |
| OOS                             | 0 | 0 | 0 | 1  | 3  | 49  | 7.5   |
| Other                           | 0 | 0 | 0 | 0  | 1  | 21  | 4.5   |
| Positive social                 | 0 | 0 | 0 | 7  | 5  | 71  | 14.5  |
| Proximity to<br>conspecifics    | 0 | 0 | 0 | 1  | 2  | 7   | 30.0  |
| Proximity to<br>visitors        | 0 | 0 | 0 | 5  | 1  | 4   | 60.0  |
| Reactivity to<br>people         | 0 | 0 | 0 | 0  | 1  | 0   | 100.0 |
| Reproduction/<br>maternal       | 0 | 0 | 0 | 1  | 0  | 13  | 7.1   |
| Resting                         | 0 | 0 | 0 | 19 | 10 | 119 | 19.6  |
| Solitary<br>behaviour           | 0 | 0 | 0 | 0  | 0  | 0   | 0.0   |
| Species typical                 | 0 | 0 | 0 | 0  | 0  | 0   | 0.0   |
| Stationary                      | 0 | 0 | 0 | 1  | 2  | 4   | 42.9  |
| Stereotypical/<br>abnormal      | 0 | 0 | 0 | 11 | 14 | 71  | 26.0  |
| Swimming                        | 0 | 0 | 0 | 1  | 3  | 3   | 57.1  |
| Vigilance                       | 0 | 0 | 0 | 6  | 16 | 54  | 28.9  |
| Visibility                      | 0 | 0 | 0 | 5  | 3  | 5   | 61.5  |
| Vocalisation                    | 0 | 0 | 0 | 0  | 1  | 18  | 5.3   |

Table S6. Details on the way in which each animal-based measures changed in reptiles

| Behaviour           | Reptiles |        |         |           |           |      | Percentage<br>changed |
|---------------------|----------|--------|---------|-----------|-----------|------|-----------------------|
|                     | Changed  | Closer | Further | Decreased | Increased | None |                       |
| Abrupt<br>behaviour | 0        | 0      | 0       | 0         | 0         | 0    | 0.0                   |

|                                 |   |   |   |   |   |    |       |
|---------------------------------|---|---|---|---|---|----|-------|
| Activity/<br>inactivity         | 0 | 0 | 0 | 4 | 4 | 14 | 36.4  |
| Behavioural<br>diversity        | 0 | 0 | 0 | 1 | 2 | 3  | 50.0  |
| Breathing rate                  | 0 | 0 | 0 | 0 | 0 | 0  | 0.0   |
| Bodyweight                      | 0 | 0 | 0 | 0 | 0 | 0  | 0.0   |
| Cortisol/<br>corticosteroids    | 0 | 0 | 0 | 0 | 0 | 0  | 0.0   |
| Enclosure use                   | 0 | 0 | 0 | 1 | 0 | 10 | 9.1   |
| Feeding                         | 0 | 0 | 0 | 0 | 0 | 3  | 0.0   |
| Grooming                        | 0 | 0 | 0 | 0 | 0 | 0  | 0.0   |
| HAI                             | 0 | 0 | 0 | 0 | 0 | 0  | 0.0   |
| HAI negative                    | 0 | 0 | 0 | 0 | 0 | 0  | 0.0   |
| HAI positive                    | 0 | 0 | 0 | 0 | 0 | 0  | 0.0   |
| Heart rate                      | 0 | 0 | 0 | 0 | 0 | 0  | 0.0   |
| Interaction with<br>environment | 0 | 0 | 0 | 0 | 1 | 6  | 14.3  |
| Locomotion                      | 0 | 0 | 0 | 0 | 0 | 3  | 0.0   |
| Maintenance                     | 0 | 0 | 0 | 0 | 0 | 1  | 0.0   |
| Negative social                 | 0 | 0 | 0 | 1 | 1 | 0  | 100.0 |
| Nervous                         | 0 | 0 | 0 | 0 | 0 | 0  | 0.0   |
| Olfactory                       | 0 | 0 | 0 | 0 | 0 | 0  | 0.0   |
| OOS                             | 0 | 0 | 0 | 0 | 1 | 10 | 9.1   |
| Other                           | 0 | 0 | 0 | 0 | 0 | 2  | 0.0   |
| Positive social                 | 0 | 0 | 0 | 1 | 2 | 5  | 37.5  |
| Proximity to<br>conspecifics    | 0 | 0 | 0 | 1 | 0 | 0  | 100.0 |
| Proximity to<br>visitors        | 0 | 0 | 0 | 0 | 0 | 0  | 0.0   |
| Reactivity to<br>people         | 0 | 0 | 0 | 0 | 0 | 0  | 0.0   |
| Reproduction/<br>maternal       | 0 | 0 | 0 | 0 | 0 | 0  | 0.0   |
| Resting                         | 0 | 0 | 0 | 0 | 0 | 2  | 0.0   |
| Solitary<br>behaviour           | 0 | 0 | 0 | 0 | 0 | 0  | 0.0   |
| Species typical                 | 0 | 0 | 0 | 0 | 0 | 0  | 0.0   |
| Stationary                      | 0 | 0 | 0 | 0 | 0 | 0  | 0.0   |
| Stereotypical/<br>abnormal      | 0 | 0 | 0 | 0 | 0 | 0  | 0.0   |
| Swimming                        | 0 | 0 | 0 | 0 | 0 | 0  | 0.0   |
| Vigilance                       | 0 | 0 | 0 | 0 | 0 | 1  | 0.0   |
| Visibility                      | 0 | 0 | 0 | 5 | 1 | 10 | 37.5  |
| Vocalisation                    | 0 | 0 | 0 | 0 | 0 | 1  | 0.0   |
